# Supplementary material for: Non-Invasive Glucose Sensing Technologies and Products: A Comprehensive Review for Researchers and Clinicians
Source: MDPI journal article supplement (doi:10.3390/s23229130), 2023-11-12
Supplement: s1 [file s1]

Table S1

| TECHNIQUE/<br>CATEGORY                      | STUDY OBJECT                                                                            | ADVANTAGES                                                                                                      | DISADVANTAGES                                                                                                           | STUDIES        | MACHINE<br>LEARNING                                                                             | PRODUCTS WITH<br>PHASE                                                                            | SAMPLE                                         | FINDINGS                                                                                                                                       | FUTURE<br>PERSPECTIVES                                 |
|---------------------------------------------|-----------------------------------------------------------------------------------------|-----------------------------------------------------------------------------------------------------------------|-------------------------------------------------------------------------------------------------------------------------|----------------|-------------------------------------------------------------------------------------------------|---------------------------------------------------------------------------------------------------|------------------------------------------------|------------------------------------------------------------------------------------------------------------------------------------------------|--------------------------------------------------------|
| OPTICAL TECHNIQUES                          |                                                                                         |                                                                                                                 |                                                                                                                         |                |                                                                                                 |                                                                                                   |                                                |                                                                                                                                                |                                                        |
| Optical<br>Coherence<br>Tomography<br>(OCT) | Reflection of light<br>by tissue with<br>interference from<br>glucose                   | Unaffected by<br>heartrate, blood<br>pressure,<br>osmolytes                                                     | High sensitivity to<br>movement and skin<br>temperature                                                                 | Reference [27] | Mueller Model<br>Algorithm                                                                      | Fingertip device                                                                                  | In vitro + In<br>vivo (4 + 3)                  | R2 ¼ 0.5993,<br>Avg SD of D among 5<br>sets of measurements<br>0.027, SD of the $\gamma$ and $\Delta$<br>at five times: 0.302 deg<br>and 0.045 | C                                                      |
|                                             |                                                                                         |                                                                                                                 |                                                                                                                         | Reference [28] | N/A                                                                                             | Low magnification<br>objective lens                                                               | In vitro                                       | Improved accuracy                                                                                                                              | A                                                      |
| Optical<br>Polarimetry<br>(OP)              | Rotation/absorptio<br>n energy of<br>polarized light<br>plane reflected<br>from glucose | Accuracy, high<br>resolution, can be<br>small in size                                                           | Low sensitivity with<br>low glucose levels,<br>sensible to albumin<br>levels and lower<br>sensitivity with dark<br>skin | Reference [13] | Partial Least<br>Squares (PLS)<br>regression                                                    | Noncontact<br>glucometer device in<br>vitro + in vivo<br>(animals)                                | In vitro+ in<br>vivo (4<br>rabbits)            | Mean differences of 8<br>mg/dl and 29.2 mg/dl for<br>the in vitro and in vivo<br>measurements between<br>aqueous and blood<br>glucose          | B                                                      |
|                                             |                                                                                         |                                                                                                                 |                                                                                                                         | Reference [31] | Boosted trees<br>regression<br>learning model                                                   | Palm and finger sensor<br>compact and low cost<br>(i.e., USD <250) with<br>off-the-shelf hardware | In vivo (41<br>T2DM + 9 C)                     | 89% in CEG A, ARD<br>10% with CGM – no<br>training or calibration<br>needed                                                                    | A+C<br>(in vitro: smaller size and<br>decreased costs) |
|                                             |                                                                                         |                                                                                                                 |                                                                                                                         | Reference [32] | N/A                                                                                             | Spatial Polarization<br>Modulation System<br>(SPMS)                                               | In vitro                                       | Resolution of 100 mg/dl                                                                                                                        | B                                                      |
|                                             |                                                                                         |                                                                                                                 |                                                                                                                         | Reference [33] | Partial Least<br>Squares (PLS)<br>regression<br>algorithm                                       | Broadband<br>polarimeter                                                                          | In vitro                                       | More precise prediction<br>of glucose concentration<br>in the presence of<br>albumin                                                           | A                                                      |
| Photoplethysmo<br>graphy (PPG)              | Amount of LED<br>light<br>transmitted/reflect<br>ed measured with<br>photodetector      | Low cost<br>ear canal sensing<br>has stable<br>temperature,<br>constant pressure,<br>consistent<br>positioning, | Sensible to blood<br>circulation and<br>movement                                                                        | Reference [39] | Support Vector<br>Machines (SVM), Gaussian<br>process<br>regression,<br>kernel<br>approximation | in-ear device<br>equipped with a low-<br>cost pulse oximeter                                      | In vivo (1<br>preDM, 1<br>T1DM,<br>1T2DM, 1 C) | 82% of the BGLs in CEG<br>A, 100% CEG A -B                                                                                                     | C                                                      |

|                                         |                     |                                                                                                 |                                                                                                                                                 |                |                                                                                                                  |                                                                                                      |                                                                  |                                                                                                                                                                                                                  |                                               |
|-----------------------------------------|---------------------|-------------------------------------------------------------------------------------------------|-------------------------------------------------------------------------------------------------------------------------------------------------|----------------|------------------------------------------------------------------------------------------------------------------|------------------------------------------------------------------------------------------------------|------------------------------------------------------------------|------------------------------------------------------------------------------------------------------------------------------------------------------------------------------------------------------------------|-----------------------------------------------|
| universal fit, and cost-effectiveness   |                     |                                                                                                 |                                                                                                                                                 |                | models, ensemble models, Neural Networks (NNs)                                                                   |                                                                                                      |                                                                  |                                                                                                                                                                                                                  |                                               |
|                                         |                     |                                                                                                 |                                                                                                                                                 | Reference [36] | Partial Least Squares (PLS) regression                                                                           | Smartphone video-based technique                                                                     | In vivo: 52 subjects                                             | lowest Standard Error of Prediction (SEP) at 17.02 mg/dL                                                                                                                                                         | C                                             |
|                                         |                     |                                                                                                 |                                                                                                                                                 | Reference [41] | Back-Propagation Neural Network (BPNN)                                                                           | dual-wavelength PPG combined with bioelectrical impedance                                            | In vivo: 40 subjects                                             | mean squared error of 40.736, a root mean squared error of 6.3824, a mean absolute error of 5.0896, a mean absolute relative difference of 4.4321%, and a coefficient of determination (R Squared, R2) of 0.997, | C + D                                         |
|                                         |                     |                                                                                                 |                                                                                                                                                 | Reference [35] | Monte Carlo S and XGBoost                                                                                        | Fingertip model                                                                                      | A. In vitrofingermode—1581 samples<br>A. In vivo—35 participants | Pearson's r = A 0.91 model/B 0.85, coefficient of determination (R <sup>2</sup> ) = A 0.83/B 0.68                                                                                                                | A +C (in vitro: variation in layer thickness) |
|                                         |                     |                                                                                                 |                                                                                                                                                 | Reference [42] | Singular Spectrum Analysis (SSA)                                                                                 | Wearable device                                                                                      | In vivo: 8 volunteers                                            | 87.06% of data on zone A of CEG, and MARD of 12.19%                                                                                                                                                              | C                                             |
| <b>Near-Infrared (NIR) spectroscopy</b> | Reflection of light | Considered one of the most effective techniques, low cost, compact, and high penetration level, | Low accuracy and absorption pattern, sensitive to tissue thickness, temperature, skin tone and melanin, substances in the tissue (fat, protein, | Reference [47] | Linear Partial Least Square Regression (PLSR) with the nonlinear Stacked Auto-Encoder (SAE) deep neural network. | light source, optical switch, optical fiber bundle and optical fiber probe, detector, and thermostat | In vivo: 19                                                      | 97.96% in CEG A                                                                                                                                                                                                  | C                                             |

|                                                           |                                                                              |                                                                                         |                                                 |                    |                                                                                   |                                                                                 |                                                              |                                                                      |                                                                                     |
|-----------------------------------------------------------|------------------------------------------------------------------------------|-----------------------------------------------------------------------------------------|-------------------------------------------------|--------------------|-----------------------------------------------------------------------------------|---------------------------------------------------------------------------------|--------------------------------------------------------------|----------------------------------------------------------------------|-------------------------------------------------------------------------------------|
|                                                           |                                                                              |                                                                                         | and water), and ambient light intensity         | Reference [43]     | Monte Carlo simulations                                                           | Inner lip— calibration method                                                   | In vivo: 1                                                   | “Extremely positive results”                                         | A+C<br>(in vitro: delay between the glucose concentration in blood and skin tissue) |
|                                                           |                                                                              |                                                                                         |                                                 | Reference [49]     | NIL                                                                               | NIR spectroscopy alongside SpO2 and heartrate in a compact fingertip sensor     | In vivo: 10 (2 DM)                                           | USD 15.6 expense average deviation for glucose was found to be 2.54% | C                                                                                   |
|                                                           |                                                                              |                                                                                         |                                                 | Reference [19]     | Monte Carlo simulation                                                            | Dual-channel measurement for glucose and noise signal for different skin colors | In vitro: finger models with different melanin concentration | Increased accuracy, better signal-to-noise ratios in darker skin     | B                                                                                   |
| <b>Mid-Infrared (MIR) spectroscopy / Optical</b>          | Narrow band light transmitted/reflect ed by vibration of glucose molecules   | More distinct absorption, up to 100 μm penetration depth with no irritation/discomfo rt | High cost                                       | Reference [52]     | Xgboost algorithm                                                                 | Developmental phase of handheld device, D-Base (Company: diomontech AG)— trial  | 100 human samples (41 diabetic and 59 healthy)               | Less than 1% of the data outside of the highest accuracy zones       | C                                                                                   |
| <b>NIR/MID absorption spectroscopy</b>                    | Combination of aspects from Near-Infrared (NIR) and Mid-Infrared (MID) light | More comprehensive spectrum of absorption by glucose molecules in body tissues          | See NIR/MID                                     | Reference [29]     | K nearest neighbor, decision tree, SVM, multiple linear regression, artificial NN | Multiwavelength measurement in the Visible (VIS) and NIR range                  | IN VITRO distilled water solutions— 4000 total test          | 99.8% in CEG A with SVM                                              | B                                                                                   |
| <b>FAR-Infrared Spectroscopy (Terahertz Spectroscopy)</b> | Vibrational and rotational transitions of glucose                            | N/A                                                                                     | Susceptible to strong light absorbance by water | NIL STUDY ANALYZED |                                                                                   |                                                                                 |                                                              |                                                                      |                                                                                     |

|                                                     |                                                                                                               |                                                                                           |                                                                                                                      |                    |                                        |                                                                                                |                            |                                                                              |                                             |
|-----------------------------------------------------|---------------------------------------------------------------------------------------------------------------|-------------------------------------------------------------------------------------------|----------------------------------------------------------------------------------------------------------------------|--------------------|----------------------------------------|------------------------------------------------------------------------------------------------|----------------------------|------------------------------------------------------------------------------|---------------------------------------------|
| <b>Terahertz-Time Domain Spectroscopy (Thz-TDS)</b> | Time delay and magnitude of the reflected or transmitted short pulses light as they interact with glucose     | Safe<br>Offers labels free sensing                                                        | Significant obstacle in developing label-free Terahertz (thz) sensors that can detect analytes with high sensitivity | Reference [57]     | Back Propagation Neural Network (BPNN) | Waveguide probe sensor unit                                                                    | IN VITRO PHANTOM           | Low-cost, accurate, and highly sensitive                                     | A+B<br>(conceptual/in vitro earlobe device) |
|                                                     |                                                                                                               |                                                                                           |                                                                                                                      | Reference [58]     | N/A                                    | S-shaped complementary resonators                                                              | In vitro                   | Good sensitivity, compact                                                    | B                                           |
| <b>Time of Flight (TOF)</b>                         | Additional capability from (Thz-TDS) to sweep through a wide range of frequencies                             | More detailed information about the material's properties                                 | As above                                                                                                             | NIL STUDY ANALYZED |                                        |                                                                                                |                            |                                                                              |                                             |
| <b>Thermal Emission Spectroscopy (TES)</b>          | Infrared radiation emitted by the body as influenced by glucose levels                                        | No penetration of light/wavelengths or calibration needed require                         | Sensible to temperature, movement, tissue thickness. Limited real-time capability                                    | NIL STUDY ANALYZED |                                        |                                                                                                |                            |                                                                              |                                             |
| <b>Scattering/Occlusion Spectroscopy</b>            | Interaction of light waves through matter                                                                     | Highly sensitive, safe, minimal interference, convenient, allows for real-time monitoring | Sensible to variations in tissue protein, fat, red blood cells aggregation, blood osmolality, skin characteristics   | NIL STUDY ANALYZED |                                        |                                                                                                |                            |                                                                              |                                             |
| <b>Photoacoustic Spectroscopy (PAS)</b>             | Heat energy creating a sound (acoustic) wave created with heat energy released by glucose on light absorption | Rapid response time, high sensitivity and selectivity, and is very precise                | Water, fat, proteins, and other substances can increase light absorption, skewing results of glucose concentration   | Reference [66]     | Ensemble classification model          | A single-wavelength MIR QCL light source with frequency modulation wavelengths of 10 to 30 khz | In vitro phantoms          | Detection of glucose for the entire range of interest of healthy/diabetic pt | B                                           |
|                                                     |                                                                                                               |                                                                                           |                                                                                                                      | Reference [64]     | N/A                                    | T-type opened resonator cells with frequency of 25 to 52 khz                                   | Not trialed—developed only | The detection of Photoacoustic (PA) signals can be enhanced                  | A                                           |
| <b>Diffuse reflectance</b>                          | Reflected light to analyze absorbance                                                                         | Real-time monitoring capability and applicability to                                      | Interference from other tissue components and temperature drifts                                                     | Reference [68]     | N/A                                    | NIR DRS prototype with a laser with two detector photodiodes                                   | In vitro                   | Miniaturization not possible                                                 | A+B<br>(in vitro: calibration)              |

|                                          |                                                                                            |                                                                                                                                                               |                                                                                                       |                    |                                  |                                                                            |                                                     |                                                                          |                             |
|------------------------------------------|--------------------------------------------------------------------------------------------|---------------------------------------------------------------------------------------------------------------------------------------------------------------|-------------------------------------------------------------------------------------------------------|--------------------|----------------------------------|----------------------------------------------------------------------------|-----------------------------------------------------|--------------------------------------------------------------------------|-----------------------------|
| spectroscopy DRS                         | coefficient parameters                                                                     | different tissue thicknesses                                                                                                                                  | causing a delay and instability                                                                       | Reference [67]     | N/A                              | NIR wavelengths of 900 – 1300                                              | In vitro: 26 phantom                                | Based on CEG measuring up to 18mM                                        | A+B (in vitro: calibration) |
| OPTICAL - NANOTECHNOLOGIES               |                                                                                            |                                                                                                                                                               |                                                                                                       |                    |                                  |                                                                            |                                                     |                                                                          |                             |
| Plasmon-Enhanced (PEF) Fluorescence      | Fluorescence signal from probes/molecules h                                                | potential for a cost-effective non-invasive                                                                                                                   | Photobleaching for fluorescence                                                                       | NIL STUDY ANALYZED |                                  |                                                                            |                                                     |                                                                          |                             |
| Carbon Quantum Dot (CQD) Fluorescence    | Changes to fluorescence emission based                                                     | low toxicity/cost, high stability, eco-friendly, biocompatible, versatility in size, applicable to skin patches/temporary tattoos, multiparametric evaluation | CQDs use harmful UV light to excite the fluorescence<br>Research at early stages                      | Reference [86]     | N/A                              | Excitation wavelength of 360 nm                                            | In vitro                                            | Hydrogel film more stable than aqueous solution but as sensitive         | A+B                         |
|                                          |                                                                                            |                                                                                                                                                               |                                                                                                       | Reference [139]    | N/A                              | Hydrogel optical fiber fluorescence sensor for Ph and glucose levels       | In vitro                                            | Simultaneous continuous monitoring of pH and glucose levels in real-time | B                           |
| Raman Spectroscopy                       | Difference between scattering lights from excited glucose                                  |                                                                                                                                                               | Probe instability<br>Tissue distortion                                                                | Reference [88]     | Multiple Linear Regression (MLR) | Non-contact fingerprint glucose detection device with optical fiber bundle | In vitro<br>In vivo—pigs ears                       | Pearson correlation coefficient, R = 0.90 on average                     | B                           |
| Surface-Enhanced Raman Scattering (SERS) | Interaction of light scattered and absorbed by plasmons and molecules on the nanostructure | Exceptional sensitivity and selectivity for molecular detection                                                                                               | Early researching phase, costs                                                                        | Reference [90]     | N/A                              | SERS nanoprobe (SiO2@Au@Ag@4-MPBA)                                         | In vitro                                            | high accuracy, even at low concentrations                                | A+B                         |
|                                          |                                                                                            |                                                                                                                                                               |                                                                                                       | Reference [91]     | CascadeForward Neural Network    | Surface-Enhanced Infrared Absorption (SEIRA) spectroscopy sensor           | In vitro: distilled water solutions—4485 total test | Potential glucose sensing and sensor calibration                         | B + D                       |
| Surface Plasmon Resonance (SPR)          | Resonance angle of light through a prism onto a metal layer, such as gold                  | Highly efficient and compact                                                                                                                                  | Very complicated, bulky, costly, long calibration time, high sensitivity to motion/temperature/s weat | Reference [94]     | N/A                              | Slow-wave Spoof Surface Plasmon Polariton (SSPP) end-fire antenna          | In vivo: 5 subjects                                 | Near-linear correlation between the glucose values and resonance shifts  | C                           |
|                                          |                                                                                            |                                                                                                                                                               |                                                                                                       | Reference [92]     | N/A                              | Novel binary photonic crystal (bphc) sensor with infrared (IR) light       | In vitro                                            | High sensitivity, and low detection limit                                | B                           |
| ELECTRIC/ELECTROMAGNETIC TECHNIQUES      |                                                                                            |                                                                                                                                                               |                                                                                                       |                    |                                  |                                                                            |                                                     |                                                                          |                             |

|                                                  |                                                                                                                   |                                                                                                                                                                        |                                                                                                                                               |                       |                                      |                                                                                                                              |                                                          |                                                                 |     |
|--------------------------------------------------|-------------------------------------------------------------------------------------------------------------------|------------------------------------------------------------------------------------------------------------------------------------------------------------------------|-----------------------------------------------------------------------------------------------------------------------------------------------|-----------------------|--------------------------------------|------------------------------------------------------------------------------------------------------------------------------|----------------------------------------------------------|-----------------------------------------------------------------|-----|
| <b>Dielectric/Micro wave (mw) Spectroscopy</b>   | Changes in magnetic permittivity (electric field)                                                                 | Enables wireless and continuous monitoring of glucose variations in the bloodstream with high accuracy                                                                 | Sensible to sweat/movement/ ambient humidity/ skin temperatures/ water content/ electrolyte concentration                                     | Reference [98]        | PCA                                  | Low-cost microwave sensor with frequency range 2.4 – 2.5 ghz                                                                 | In vitro<br>In vivo: 2                                   | No delay compared with BGM, low cost, small size                | C   |
|                                                  |                                                                                                                   |                                                                                                                                                                        |                                                                                                                                               | Reference [99]        | Gaussian Process Regression (GPR)    | Wearable multi-sensor system of blood glucose, motion, skin conductance response/temperature, external temperature, humidity | In vivo: rats, pigs, 28 humans (18 diabetic, 10 healthy) | Clinical accuracy of continuous glucose monitoring of 99.01%    | C   |
| <b>Millimeter Wave (mmw) and Microwaves (MW)</b> | Reflection, transmittance, vibration (resonant perturbation), and re-bounce (radar) of waves encountering glucose | Highly sensitive, real-time readings, flexible, consumes low power, easy to manufacture, robust, small in size, portable, cost-effective, nil precise alignment needed | Not safe for continuous glucose monitoring as repeat exposure could cause damage to the tissue. Sensible to physiological variations in blood | Reference [106]       | Complex-Valued Neural Network (CVNN) | Measurements through the earlobe or finger web between 3 and 5 mm thick using silicon-loaded probes                          | In vitro<br>In vivo                                      | Silicon loading at the probes enhances the CVNN ability         | C   |
|                                                  |                                                                                                                   |                                                                                                                                                                        |                                                                                                                                               | Reference [40]        | N/A                                  | Compact finger slot reader or fingertip                                                                                      | In vitro                                                 | Cost-effective, compact, non-ionizing in nature, and convenient | B   |
|                                                  |                                                                                                                   |                                                                                                                                                                        |                                                                                                                                               | References [107, 108] | N/A                                  | Forearm (near-field and bioheat transfer models)                                                                             | In vitro                                                 | High accuracy                                                   | B   |
|                                                  |                                                                                                                   |                                                                                                                                                                        |                                                                                                                                               | Reference [109]       | N/A                                  | Earlobe probe with Diffusion Limited Aggregation (DLA) fractal method                                                        | In vivo                                                  | Feasibility                                                     | B   |
|                                                  |                                                                                                                   |                                                                                                                                                                        |                                                                                                                                               | Reference [110]       | N/A                                  | Near-field coaxial conic probe using reflection method in the frequency range of 1.4 – 1.7 ghz                               | In vitro: phantoms                                       | Resolution of 1 mmol/L (18 mg/dl)                               | B   |
|                                                  |                                                                                                                   |                                                                                                                                                                        |                                                                                                                                               | Reference [116]       | N/A                                  | Retrofitted 60 ghz mm-W Soli alpha kit radar system                                                                          | In vitro                                                 | Potential for high accuracy but in early phases                 | A+B |
|                                                  |                                                                                                                   |                                                                                                                                                                        |                                                                                                                                               | Reference [113]       | N/A                                  | Single asymmetric SRR resonating at 7 GHz                                                                                    | In vitro                                                 | High sensitivity                                                | B   |
|                                                  |                                                                                                                   |                                                                                                                                                                        |                                                                                                                                               | Reference [114]       | N/A                                  | Five microstrip antennas and high                                                                                            | In vitro                                                 | Stability, consistency, and reliability                         | B   |

|                                  |                                                                                        |                                                                                                              |                                                                                                                                                                                                  |                 |                                 | resonant frequency band                                                                                                    |                      |                                                                                           |     |
|----------------------------------|----------------------------------------------------------------------------------------|--------------------------------------------------------------------------------------------------------------|--------------------------------------------------------------------------------------------------------------------------------------------------------------------------------------------------|-----------------|---------------------------------|----------------------------------------------------------------------------------------------------------------------------|----------------------|-------------------------------------------------------------------------------------------|-----|
| Radio Frequency (rf)             | Shifts in resonant frequencies                                                         | Cost efficient, compact, seamlessly connecting to Bluetooth/smartphones                                      | Mathematical model complexity                                                                                                                                                                    | Reference [117] | N/A                             | Interdigital Transducers (IDT) or Stepped Impedance Resonators (SIR)                                                       | In vitro             | Linear relationship between resonance frequency changes and glucose levels                | B   |
|                                  |                                                                                        |                                                                                                              |                                                                                                                                                                                                  | Reference [98]  | N/A                             | Portable fingertip prototype at 2.45 ghz radar band                                                                        | In vitro             | Cost effective                                                                            | B   |
| Bio-Impedance Spectroscopy (BIS) | Voltage changes to alternating electrical current to the skin                          | Inexpensive, safe, small in size, reliable, and fast acting.                                                 | Wrist circumference and wrist temperature, as well as body weight as physiological parameters which can impact the accuracy + sensor's complexity, and is unstable with either sweat or movement | Reference [123] | Effective Medium Theory (EMT)   | Simplified physical model for blood electrical conductivity                                                                | In vitro             | maximum error of 5.2%, early phase                                                        | A+B |
|                                  |                                                                                        |                                                                                                              |                                                                                                                                                                                                  | Reference [41]  | Back-Propagation Neural Network | Combination of dual-wavelength PPG and BIS in the frequency range of 50 and 100 khz between the index and under the wrists | In vivo: 40 subjects | MARD of 4.4321% within the clinically accurate region A in the Clarke Error Grid analyses | C   |
|                                  |                                                                                        |                                                                                                              |                                                                                                                                                                                                  | Reference [112] | N/A                             | Custom-fit, biocompatible, wearable ring and wrist device for bio-impedance, skin temperature, and movement                | In vivo: 14 T2DM     | Mean Absolute Relative Difference (MARD) of 17.9, 99% values CEG A-B                      | C+D |
| Ultrasound (US)                  | Propagation time of US waves through a medium (propagation time or acoustic impedance) | Ability to penetrate long distances into the tissue, high sensitivity. Not sensible to skin color variations | High cost, sensitivity to temperature and pressure                                                                                                                                               | Reference [124] | N/A                             | Ultrasonic-assisted MIR spectroscopic /OCT imaging method                                                                  | In vitro             | Potential for non-invasive monitoring of glucose                                          | C+D |
| PHYSIOLOGICAL TECHNIQUES         |                                                                                        |                                                                                                              |                                                                                                                                                                                                  |                 |                                 |                                                                                                                            |                      |                                                                                           |     |

|                  |                                                                                                              |                                                |                                                    |                 |                                                                                                                                                                                                                                                                                       |                                                                                                                                         |                                      |                                         |                 |
|------------------|--------------------------------------------------------------------------------------------------------------|------------------------------------------------|----------------------------------------------------|-----------------|---------------------------------------------------------------------------------------------------------------------------------------------------------------------------------------------------------------------------------------------------------------------------------------|-----------------------------------------------------------------------------------------------------------------------------------------|--------------------------------------|-----------------------------------------|-----------------|
| Cardiac features | Higher Resting Heart Rate (RHR) and longer P waves when cardiac autonomic nerve function impaired by glucose | Not being influenced by other blood components | Affected by other factors (such as BMI and gender) | Reference [126] | Deep Neural Network                                                                                                                                                                                                                                                                   | IGRNET = 5 seconds 12-lead Electrocardiogram (ECG)                                                                                      | In vivo (retrospective) : 2914 cases | Diagnostic accuracy 0.781, AUC is 0.777 | C (prospective) |
|                  |                                                                                                              |                                                |                                                    | Reference [127] | Linear Regression (LR), Support Vector Regression (SVR), K Nearest Neighbors Regression (KNN), Decision Trees Regression (DTR), Bagging Trees Regression (BTR), Random Forest Regression (RFR), Gaussian Process Regression (GPR), and Multi-layer Perceptron Regression (MLP or NNR) | Glucose-based smartwatch with optical, electromagnetic, and thermal sensors to measure up to 14 features among which HR, blood pressure | In vivo (retrospective+ prospective) | No accurate enough prediction           | A               |

A = in vitro, B = in vivo, C = larger cohort, D = Machine Learning application/expansion

Table S2

| Device                 | Company           | Method          | Technique                                                         | Site             | Continuous / Intermittent |
|------------------------|-------------------|-----------------|-------------------------------------------------------------------|------------------|---------------------------|
| Glucoband              | Calisto Medical   | Electromagnetic | Bio-Impedance Spectroscopy (Bio-Electromagnetic Resonance (BEMR™) | Wrist            | C                         |
| GlucoTrack             | GlucoTrack, Inc.* | Electromagnetic | Bio-Impedance Spectroscopy                                        | Wrist            | I                         |
| DeepGluco™             | Alertgy           | Electromagnetic | Dielectric Spectroscopy                                           | Wrist            | C                         |
| EM Hand and Leg Sensor |                   | Electromagnetic | Dielectric Spectroscopy                                           | Wrist, hand, leg | C                         |



|                                        |                                                  |                           |                                                             |                        |           |
|----------------------------------------|--------------------------------------------------|---------------------------|-------------------------------------------------------------|------------------------|-----------|
| <b>Multisensor</b>                     | Solianis Monitoring AG / Biovotion AG            | Optical                   | Diffuse Reflectance Spectroscopy (DRS) and NIR Spectroscopy | Arm                    | C         |
| <b>BioMKR</b>                          | Diktor Medical                                   | Optical                   | Diffuse Reflectance Spectroscopy (DRS) and NIR Spectroscopy | Wrist                  | C         |
| <b>Pendragon Pendra</b>                | Pendragon Medical AG                             | Electromagnetic           | Impedance Spectroscopy                                      | Wrist                  | C         |
| <b>HypoMon</b>                         | AI Medics                                        | Physiological             | Metabolic heat conformation                                 | Chest                  | C         |
| <b>GlucoGenius</b>                     | ESERdigital                                      | Physiological             | Metabolic heat conformation                                 | Finger                 | I         |
| <b>NYSE:HIT</b>                        | Hitachi Ltd.                                     | Physiological             | Metabolic heat conformation                                 | Fingertip              | I         |
| <b>Gluco Quantum</b>                   | Genki Vantage Limited                            | Physiological             | Metabolic heat conformation + **                            | Fingertip              | I         |
| <b>LTT</b>                             | light touch technology                           | Optical                   | MIR Spectroscopy/optical parametric oscillation             | Finger                 | I         |
| <b>metaSENSE</b>                       | MediWise                                         | Electromagnetic           | mmW/MW/UHF Spectroscopy                                     | Finger                 | I         |
| <b>GlucoWise</b>                       | MediWise                                         | Electromagnetic           | mm-Wave Transmission Spectroscopy                           | Hand                   | I         |
| <b>WizmiTM</b>                         | Wear2b Ltd                                       | Optical                   | NIR Spectroscopy                                            | Arm, Wrist             | I         |
| <b>Glucose tracker clip</b>            | AnnNIGM                                          | Optical                   | NIR Spectroscopy                                            | Earlobe                | I         |
| <b>Brolis Sensor Technology</b>        | Brolis                                           | Optical                   | NIR Spectroscopy                                            | Finger                 | N/A       |
| <b>GluControl GC300</b>                | ArithMed GmbH and Samsung Fine Chemicals Co. Ltd | Optical                   | NIR Spectroscopy                                            | Finger                 | I         |
| <b>HELO Extense</b>                    | World Global Network (WGN) - Wor(l)d             | Optical                   | NIR Spectroscopy                                            | Finger                 | I         |
| <b>GlucoStation</b>                    | GlucoActive                                      | Optical                   | NIR Spectroscopy                                            | Forearm                | I         |
| <b>Sensys GTS</b>                      | Sensys Medical Inc                               | Optical                   | NIR Spectroscopy                                            | Forearm                | I         |
| <b>D-S/P*****</b>                      | DiaMonTech                                       | Optical                   | NIR Spectroscopy                                            | Wrist / Finger         | C / I     |
| <b>TouchTrack Pro</b>                  |                                                  | Optical                   | NIR Spectroscopy                                            |                        |           |
| <b>VitalSpex Pro &amp; Bioptx Band</b> | Rockley Photonics                                | Optical                   | NIR Spectroscopy and Photoplethysmography (PPG)             | Wrist                  | C         |
| <b>NBM-200G</b>                        | OrSense Ltd.                                     | Optical                   | NIR Spectroscopy (Occlusion)                                | Finger                 | I         |
| <b>No-Invasive Glucometer</b>          | Tech4Life                                        | Optical                   | NIR/PPG                                                     | Finger                 | I         |
| <b>Companion CM/SR/LS ***</b>          | Socrates Health Solutions                        | Optical                   | Optical polarization                                        | Wrist/ Earlobe/ Finger | C / I / I |
| <b>The Smart Capsule™</b>              | Cnoga Medical Ltd.                               | Optical & Electromagnetic | Optical, thermal, bioimpedance signals                      | Wrist                  | C         |
| <b>Aprise</b>                          | Glucon                                           | Optical                   | Photoacoustic Spectroscopy                                  | Forearm                | C         |
| <b>WrisTee</b>                         | Dartmouth College                                | Optical                   | Photoplethysmography (PPG)                                  | Wrist                  | C         |
| <b>GlucoDiary</b>                      | ESERdigital                                      | Optical and Physiological | photoplethysmography (PPG) and Metabolic heat conformation  | Finger                 | I         |

|                               |                                   |                 |                                                                    |                 |   |
|-------------------------------|-----------------------------------|-----------------|--------------------------------------------------------------------|-----------------|---|
| <b>Sanmina</b>                | Sanmina Corp.                     | Optical         | Photoplethysmography (PPG) and Metabolic heat confirmation         | Ear canal       | C |
| <b>LIFELEAF</b>               | LifePlus, Inc.                    | Optical         | PPG                                                                | Wrist           | C |
| <b>Glutrac</b>                | Add Care Ltd                      | Optical         | PPG, absorption spectroscopy, metabolic heat conformation, and ECG | Wrist           | C |
| <b>KnowU &amp; Uband</b>      | Know Labs                         | Optical         | Raman Scattering                                                   | Finger, wrist   | C |
| <b>OGMS***</b>                | C8 MediSensors                    | Optical         | Raman Spectroscopy                                                 | Finger          | I |
| <b>OptiScanner 5000</b>       | OptiScan Biomedical Corporation   | Optical         | Raman Spectroscopy                                                 | Finger          | I |
| <b>GlucoBeam</b>              | RSP Systems                       | Optical         | Raman Spectroscopy                                                 | Finger / Palm   | I |
| <b>GlucoSense Diagnostics</b> | LDT Design                        | Optical         | Raman Spectroscopy                                                 | Fingertip, Skin | I |
| <b>GWave</b>                  | Hagar Tech                        | Electromagnetic | RF Spectroscopy                                                    | Wrist           | C |
| <b>Movano Wearable CGM</b>    | Movano                            | Electromagnetic | RF Spectroscopy                                                    | Wrist           | C |
| <b>GlucoWear</b>              | Afon Technology                   | Electromagnetic | RF/MW Spectroscopy                                                 | Wrist           | C |
| <b>GlucoTrack</b>             | Integrity Applications Ltd        | Electromagnetic | Ultra-sound, application of electromagnetic waves and calorimetry  | Earlobe         | I |
| <b>Egm1000</b>                | Evia Medical Technologies Limited |                 | Ultra-sound, application of electromagnetic waves and thermal      | Earlobe         | I |

C= continuous, I=Intermittent

\*was Integrity Applications Ltd, \*\* heart rate, blood pressure, blood oxygen saturation, blood-flow velocity and ECG, \*\*\* CM=continuous monitor, SR= single read, LS =lifestyle, \*\*\*\* Optical Glucose Monitoring System, \*\*\*\*\* D-SP= Sensor, pocket
